# Supplementary material for: Transcriptomic data in tumor‐adjacent normal tissues harbor prognostic information on multiple cancer types
Source: PubMed Central journal article supplement (PMC10242347; doi:10.1002/cam4.5864), 2023-03-31
Supplement: CAM4-12-11960-s001.pdf [file CAM4-12-11960-s001.pdf]

**Table S1; Screening gene list by ICGC datasets.**

| Rank | Kidney Normal | Kidney Tumor | Liver Normal  | Liver Tumor  | Rank | Kidney Normal | Kidney Tumor | Liver Normal | Liver Tumor |
|------|---------------|--------------|---------------|--------------|------|---------------|--------------|--------------|-------------|
| 1    | CD74          | SIRPG        | HPD           | MRPS24       | 501  | BDKRB2        | PHLD2        | ASAP1        | CHCHD5      |
| 2    | NKAIN1        | ASIC1        | P4HA1         | URGCP-MRPS24 | 502  | PLEKHA5       | CNO18        | SLC23A1      | NARF        |
| 3    | GRAMD1A       | TNS4         | AGMAT         | FUNDC2       | 503  | PHETA1        | ALS2         | SFXN5        | UBE2J2      |
| 4    | CYP3A4        | CCN1         | ARID3C        | LPCAT1       | 504  | LRRC42        | APLF         | TMOD3        | ZCRB1       |
| 5    | KRT8          | RTP3         | ANGPT2        | EIF3B        | 505  | WDR45         | MSR1         | NME1-NME2    | TIMMDC1     |
| 6    | STAP2         | DCXR         | DNAJC16       | EXOC4        | 506  | CSK           | SLC40A1      | ID2          | RPL13       |
| 7    | OTOS          | ECEL1        | GLYAT         | ENO1         | 507  | ALYREF        | PNRC2        | SLC39A5      | C1R         |
| 8    | IPO4          | ZNF100       | DLL4          | EIF4A3       | 508  | MYL9          | USP34        | CPD          | RPS6        |
| 9    | MME           | IQCA1        | PIPOX         | MFS5D5       | 509  | TLL1          | TANK         | PLAU         | ACVR1       |
| 10   | SLC35F6       | HAUS3        | EPHX1         | ARPC1A       | 510  | NTSDC2        | EPC2         | ESPN         | SCAMP3      |
| 11   | CTS2          | HERC4        | FGL1          | CPSF4        | 511  | SORD          | ZFC3H1       | SAA4         | ITPA        |
| 12   | PLA2G4C       | ANKRD42      | CES4A         | SNF8         | 512  | SLC6A8        | RNF168       | GSTK1        | PALMD       |
| 13   | KRT18         | NA           | PKD2          | CCDC86       | 513  | TNIP2         | SCML1        | HNRNPR       | C7orf26     |
| 14   | IFB5          | ARMC9        | CYP2C9        | COP56        | 514  | FCN2          | LRRC8D       | ZNF462       | RPL23       |
| 15   | PIGS          | DNAJB4       | SERPINA4      | UBE2M        | 515  | HSPB1         | CAAP1        | DCP2         | ADM         |
| 16   | WEE2          | ANKRD6       | GSTA1         | PHB          | 516  | VASN          | PBRM1        | KNG1         | PYGB        |
| 17   | HM13          | SATB1        | UGT2B10       | GNB2         | 517  | CDKN1C        | JMJD1C       | PCP4L1       | GPR89A      |
| 18   | IGSF21        | ANKRD26      | TM6SF2        | DHX37        | 518  | TOMM34        | ETAA1        | VWA1         | VPS25       |
| 19   | CYP3A7        | FAM200B      | SEC14L2       | SLC6A8       | 519  | UBE2F         | LEPR         | BHD2         | STARD3      |
| 20   | CFB           | GAS2         | CRP           | ABCF2        | 520  | CRACDL        | ANAPC1       | MDFIC        | YKT6        |
| 21   | A4GALT        | KCNJ10       | ABHD15        | ANGPT2       | 521  | STX5          | WIP2         | YRDC         | NDUFS6      |
| 22   | PLAAT4        | USP33        | HRG           | RALA         | 522  | TFEB          | ECPAS        | PCCB         | RPLP2       |
| 23   | POLD3         | VPS26A       | FLT1          | PTCD1        | 523  | KLC3          | ZFP90        | VMP1         | PITRM1      |
| 24   | AIFM2         | RND3         | AMACR         | COP21        | 524  | PRAME         | SLC1A3       | BRAF         | FAM98C      |
| 25   | PHC2          | ZMYM6        | C1QTNF3-AMACR | RUVBL1       | 525  | KLLN          | CARD8        | KCNJ2        | DTD1        |
| 26   | C2            | USP53        | PKC2          | BUD31        | 526  | TAP2          | RBM41        | HSPA14       | NR2C2AP     |
| 27   | TMEM88        | ZNF721       | ELFN1         | PKIB         | 527  | TEKT5         | ATP10D       | CSNK1A1      | DTNBP1      |
| 28   | SECTM1        | MERTK        | LOX           | POLD2        | 528  | C1QA          | LGALS4       | PRDX6        | POLR2L      |
| 29   | TMIGD1        | ERCC3        | MED30         | PPIA         | 529  | RTN1          | RABGAP1      | SLC1A1       | SLC10A3     |
| 30   | ABCF1         | WDR11        | C16orf87      | EIF4H        | 530  | KCNF1         | CREBRF       | PKD1         | HAS3        |
| 31   | LTBR          | RNF180       | ARMCX3        | PGAM1        | 531  | ADSS1         | TAS2R5       | ETNK2        | SMS         |
| 32   | CDNF          | HECTD2       | PPL           | PRPF19       | 532  | RBCK1         | ZNF776       | HACE1        | FBP1        |
| 33   | PRSS21        | ODF2L        | S1PR5         | CDK4         | 533  | NLRP14        | GANC         | ATP6V1G1     | C12orf43    |
| 34   | PNPLA1        | ZDBF2        | SLC20A2       | DTYMK        | 534  | MTHFD1L       | RCHY1        | NCAM1        | CHCHD1      |
| 35   | TNFRSF1A      | C10orf88     | SERPIND1      | DDX54        | 535  | ABCF2         | ZNF316       | FBXL7        | NXT1        |
| 36   | VWCE          | LCA5         | IFITM2        | NME1-NME2    | 536  | DDX23         | FGF2         | MYLCD        | GSTM3       |
| 37   | CYTH2         | RUFY2        | CES1          | LAGE3        | 537  | NOX1          | TMEM241      | RPL34        | REEP4       |
| 38   | THOC6         | OSBP19       | OTUD1         | SEC61G       | 538  | ZNF98         | ZBED1        | HNRNPK       | UTP20       |
| 39   | SERPING1      | OSER1        | CYP8B1        | TXNL4A       | 539  | UBE2M         | GABPA        | LBP          | SLC2A9      |
| 40   | THNSL1        | PDE8A        | UROC1         | SARNP        | 540  | LILRA2        | ZNF214       | FLOT1        | TIMM9       |
| 41   | SCUBE1        | BCL10        | PXDN          | TP1          | 541  | CLDN4         | HNRNPA2B1    | CYP4F2       | NT5C        |
| 42   | PLTP          | WEE1         | SLC26A1       | MYL6B        | 542  | CFAP69        | CTTNBP2NL    | PCDHGA3      | CDT1        |
| 43   | CD99          | CACUL1       | TF            | CIAPIN1      | 543  | GAL3ST4       | PIFO         | PCDHA3       | RRP36       |
| 44   | CFI1          | PPM1K        | CHSY3         | NME2         | 544  | FKBP1A        | ZNF621       | COL27A1      | VBP1        |
| 45   | CCN1          | ZNF25        | PDE11A        | MRPL11       | 545  | TGIF1         | FAR1         | VTN          | DSC2        |
| 46   | RHOG          | MTAP         | SMNDC1        | RPL22        | 546  | CRYAB         | RBM7         | RORC         | STC2        |
| 47   | RNLS          | PPM1D        | HEY1          | ATP1B3       | 547  | TXNL4B        | RSPH1        | SNX9         | NUDCD3      |
| 48   | PLVAP         | CHAC1        | TERF2IP       | EGLN3        | 548  | MIIP          | ZNF260       | ATP6V1C1     | ADCK2       |
| 49   | CNKSR3        | TIAL1        | BCL2L11       | KDM1A        | 549  | FAM174C       | PCDH84       | MCAM         | SPATS2      |
| 50   | DDX19B        | EFCAB7       | GGXC          | SNRPD2       | 550  | SBK2          | EMC9         | GPCPD1       | RPS11       |
| 51   | VPS4A         | NBPF3        | ATP6V0E2      | SNRPD1       | 551  | TP53INP2      | ZBTB34       | TTBK1        | RPA3        |
| 52   | HHIP          | HDAC9        | HNRNPH2       | PTGFRN       | 552  | CD151         | MBD5         | MRPL17       | VAPA        |
| 53   | CIB2          | PIK3CA       | TSKU          | MAPKAPK5     | 553  | PLEKHO2       | TMPPRS12     | IFITM3       | MYBL2       |
| 54   | CCL26         | IGFBP4       | KLKB1         | ALG1         | 554  | ADPRS         | SF3A3        | HACL1        | KRT10       |
| 55   | DMGDH         | ABRAXAS2     | SERPINA5      | TIMM22       | 555  | PCP4          | NAALAD2      | MAOB         | POLR2J      |
| 56   | ANGPTL3       | AGL          | SLC6A12       | EIF1         | 556  | RASGRP4       | MAPK8        | HECTD1       | HNRNPR      |
| 57   | MMP2          | PTK6         | ICOSLG        | YWHAG        | 557  | HMGAI1        | HBP1         | ZNF217       | UBE3C       |
| 58   | CHMP7         | FMR1         | FNDC3B        | ESYT2        | 558  | INAFM2        | ZNF549       | BCO2         | TTCT2       |
| 59   | MTARC2        | TCTN2        | GPD1          | RPL27        | 559  | RNASET2       | RBM17        | PRPF18       | SSU72       |
| 60   | STK19         | IGFLR1       | BHMT          | POP7         | 560  | EPGN          | KLF3         | SEC11A       | RPSA        |
| 61   | RAB20         | PTAR1        | XDH           | MTCH1        | 561  | INAFM1        | L3MBTL3      | PRMT6        | RAB5B       |
| 62   | TEAD4         | ZBTB5        | IVNS1ABP      | KNG1         | 562  | PCBP1         | KLHDC7B      | HMGNS        | MIIP        |
| 63   | GNG4          | PARG         | SGPP1         | PPP2R1A      | 563  | MAP2K2        | KLRF1        | CHAC2        | RNF216      |
| 64   | TRIP6         | KCNN4        | GCK           | MTFP1        | 564  | ZNF296        | RPAP2        | NUP50        | QPCTL       |
| 65   | RASD1         | SLC38A2      | TBC1D15       | NLE1         | 565  | RETREG3       | TTC14        | CDC14B       | TMED1       |
| 66   | ACTG1         | ZNF613       | ACE2          | PARK7        | 566  | TOE1          | ABI1         | FOXF1        | CTDNBP1     |
| 67   | LRRN4         | THSD7A       | EFNB2         | ATIC         | 567  | GIPC2         | UBQLN1       | AZ12         | HPX         |
| 68   | RELB          | RAB26        | DIO1          | MLST8        | 568  | CPA1          | STX16-NPEPL1 | BTF3L4       | UBE2A       |
| 69   | AFM           | PACRGL       | FER           | HK2          | 569  | IFITM1        | LEM3D        | NDRG2        | CDC123      |
| 70   | GPR143        | UNC93A       | SAP30         | ATP6V0C      | 570  | TAPB          | N4BP2L1      | TOX2         | ZBTB80S     |
| 71   | ST13          | ZFAND4       | KLC4          | PLIN3        | 571  | SMARCAL1      | IFIT1        | CLPTM1       | RNF11       |
| 72   | LRRC8D        | NUP54        | TGFBR3        | AATF         | 572  | PPT2          | NUFIP2       | ARL4C        | NR1H2       |
| 73   | TEKT3         | EXOC1        | NUDCD3        | CUEDC2       | 573  | MARS1         | LSM11        | FTCD         | TRNAU1AP    |
| 74   | CDK2AP2       | BICC1        | SMC4          | SLC4A2       | 574  | CELF4         | STX12        | CLNS1A       | ATP6V1F     |
| 75   | CDC20B        | AK3          | IMPA2         | NSUN4        | 575  | KMO           | ZNF248       | HNRNPU       | NCL         |
| 76   | SLC39A7       | BMPRI1A      | DNAJC25       | PDA1         | 576  | SKIDA1        | SCAF11       | ABHD14A-ACY1 | PATL1       |
| 77   | RPEL1         | WASHC2A      | NPM1          | DNAJC7       | 577  | TMEM121B      | PGBD1        | OGDHL        | TSPO        |
| 78   | FAM167B       | PTPDC1       | KLHDC7A       | CCZ1         | 578  | GGH           | FBXL13       | TSN          | PWP1        |
| 79   | HSPA5         | UHRF2        | DAO           | PFKFB4       | 579  | CYBC1         | RFXAP        | WNT11        | BZW2        |
| 80   | HEPACAM       | IRAG2        | RABGGTB       | SNX17        | 580  | LRPPRC        | ZNF154       | DNAJC9       | RPL23A      |
| 81   | CLDN9         | PRPF4B       | FAM89A        | RHOC         | 581  | ALDH9A1       | EDIL3        | BTBD11       | MED24       |
| 82   | ALB           | WAPL         | GCOM1         | MRPL37       | 582  | IER5L         | ZDHHC12      | PHF8         | RP1         |
| 83   | CTSE          | BHLH89       | FABP3         | MBOAT7       | 583  | ATF3          | BST1         | NR1H2        | CENPM       |
| 84   | BAX           | MINDY3       | HIC1          | FAM50A       | 584  | SLC35A2       | DCAF12       | WHAMM        | SMOX        |
| 85   | C5AR1         | TCTN1        | CYP4F11       | SNX8         | 585  | TRAPP1C       | KBTBD2       | PGM1         | ATP6V1E1    |
| 86   | IL32          | MPHOSPH6     | EGLN3         | UTP18        | 586  | RNPS1         | TYRO3        | NUP107       | SMARCE1     |
| 87   | USP51         | SKIL         | FAAH2         | PGK1         | 587  | ATP5MGL       | TFCP2        | CD80         | GTPPB8      |
| 88   | PDLIM1        | ZNF304       | SLC17A3       | LSM4         | 588  | CNN2          | NCK1         | ALPL         | TMEM148     |
| 89   | PAH           | USP54        | DEK           | POLE4        | 589  | IFFO2         | CPED1        | SOCS2        | ARF5        |
| 90   | MSH3          | ZNF254       | MCM8BP        | CTDP1        | 590  | PHLDA2        | FNIP1        | ARMCX1       | ATAD3A      |
| 91   | FLOT1         | RASGRP3      | CRAT          | MRS12        | 591  | S100A11       | ACVR2A       | TIMM17B      | RRB         |
| 92   | GSTA2         | MARCHF5      | UGT2B4        | EFTUD2       | 592  | MAD1L1        | LRRC1        | PCDHA7       | CENPN       |
| 93   | FGFBP1        | ZZZ3         | ACOX2         | BR13         | 593  | HLA-B         | SECISBP2L    | PUM2         | BAK1        |
| 94   | GPR89B        | TDRD6        | KCNE4         | TMEM141      | 594  | UGT2B7        | CENPC        | CLDN5        | CRTAP       |
| 95   | ACTB          | NDUFAF7      | TCP11L1       | DCTN2        | 595  | IER3          | MINDY2       | SLC15A1      | TRAI        |
| 96   | GPC4          | SLF2         | DPP4          | KTI12        | 596  | FAM110A       | PLD1         | RPSA         | MPG         |
| 97   | ALDH3A2       | CD200        | THRSF         | PGLS         | 597  | GABRB2        | ZNF711       | LRIG3        | MAP4        |
| 98   | WAS           | CCP110       | CES2          | MARCKSL1     | 598  | IL17D         | LIMD2        | ALDOB        | STAM        |
| 99   | JVL           | IKZF5        | DCTN6         | MAPK3        | 599  | ABC1          | RCL1         | RPIA         | HNRNPM      |
| 100  | IFITM3        | RASGEF1B     | BLMH          | DCTPP1       | 600  | XPO7          | SCHIP1       | KIAA0586     | WAC         |
| 101  | PDIA3         | LRRN2        | SELENBP1      | TMEM109      | 601  | TMEM106A      | LOC344065    | NAP1L5       | MLX         |

**Table S1; Screening gene list by ICGC datasets.**

| Rank | Kidney Normal | Kidney Tumor  | Liver Normal | Liver Tumor | Rank | Kidney Normal | Kidney Tumor | Liver Normal | Liver Tumor   |
|------|---------------|---------------|--------------|-------------|------|---------------|--------------|--------------|---------------|
| 102  | ITGB2         | PDCD4         | NRBF2        | RS1D1       | 602  | TMEM51        | ZNF441       | DDX24        | MRPL42        |
| 103  | COL19A1       | PAWR          | MOGAT2       | RPS8        | 603  | NA            | SLC7A6OS     | CLRN3        | CDK2AP1       |
| 104  | UBALD2        | CDC14A        | NRP1         | BLMH        | 604  | DNTTIP1       | MAK          | HNRNPA1      | GRN           |
| 105  | DCTN2         | KIFBP         | SULT1A2      | AGFG1       | 605  | ITPRIP        | CCSER2       | RNF13        | TMEM234       |
| 106  | GCH1          | ZNF217        | HNF4A        | ATP6AP1     | 606  | CAPG          | ZNF528       | ACBD4        | GNS           |
| 107  | CLCF1         | GPRASP2       | HADH         | TBC1D7      | 607  | BHMT          | CEP290       | XPNPEP3      | C2orf27       |
| 108  | RNF212B       | RASA2         | AQP7         | COASY       | 608  | ACTN1         | DYNC1L12     | PYROXD1      | LIMS1         |
| 109  | CTS5          | CDK13         | LDHA         | UQCRH       | 609  | COL23A1       | IL1RAP       | NHLRC1       | SNN           |
| 110  | ACTR1A        | ARHGAP12      | HPRT1        | PFKM        | 610  | GLYAT         | CDC37L1      | RPS16        | OAZ1          |
| 111  | CCDC137       | ZRANB2        | FAM186B      | KHDRBS1     | 611  | DPEP3         | ZNF330       | PAG1         | PPM1G         |
| 112  | FADS3         | DNAI4         | USP2         | NUDT1       | 612  | GRIPAP1       | MYSM1        | UGP2         | DVL2          |
| 113  | ACOT6         | TBC1D12       | HNRNPF       | UBE2S       | 613  | MACROH2A1     | MYLIP        | TMCC3        | DCBLD2        |
| 114  | TRIM10        | SMNDC1        | CCT8         | GTF3C6      | 614  | BEX1          | THNSL1       | ARPC5L       | ACACA         |
| 115  | SP11          | IFNAR2        | GLIS3        | EEF1E1      | 615  | ACOX2         | NHLRC2       | ACY1         | ZNF540        |
| 116  | ZYX           | INH4          | F10          | AP4M1       | 616  | CPLX1         | ITGB1        | TAF12        | RAB41         |
| 117  | MAP1LC3A      | ARID4B        | ALDH5A1      | NDUFB2      | 617  | CYB5A         | KCTD10       | UBE2D1       | XPNPEP1       |
| 118  | SH2B2         | TNKS2         | PAFAH2       | UBE2Z       | 618  | LILRA1        | HGH1         | RS124D1      | RPP30         |
| 119  | ADAMTSL2      | TBC1D9        | AFM          | PPP2R3A     | 619  | C17orf64      | TDRD7        | LCORL        | IFT57         |
| 120  | NUAK2         | PPP3CB        | TMPRSS6      | MARCKS      | 620  | CCDC96        | PCGF5        | FKBP1B       | SERPINB6      |
| 121  | VSIG10L       | ZNF506        | FLOT2        | RAMP3       | 621  | TREM2         | BIRC2        | WWTR1        | SEH1L         |
| 122  | ARF6          | HDX           | UBA2         | MKRN1       | 622  | RHOB          | POLR3A       | HELB         | PRMT5         |
| 123  | PDXP          | SRSF11        | GTF2E2       | PPP1CA      | 623  | SERPINE2      | EMC10        | IPMK         | F9            |
| 124  | EPHA2         | RPGRIP1L      | MTUS1        | PACSLN2     | 624  | GDF5          | TRUB1        | CD93         | SMPD4         |
| 125  | CLDN6         | TRAF3IP1      | AGBL4        | RANBP1      | 625  | TSPAN1        | SOC56        | PHGDH        | EIF4EBP1      |
| 126  | ELF3          | RANBP9        | MED28        | DNAJB6      | 626  | SRPRA         | PLEKH2       | STX6         | SERPINA6      |
| 127  | SPAG4         | ZFP3          | AZIN1        | RPF2        | 627  | ULBP2         | RAP2C        | SARDH        | POMGNT1       |
| 128  | PILRA         | MORC3         | STC2         | RPL11       | 628  | MYC           | ZNF749       | SERPINE2     | MRPS30        |
| 129  | CDC25B        | TUT4          | SLC6A1       | SNRPB       | 629  | TMEM268       | GOLTA1       | ALDH1A3      | RPL27A        |
| 130  | SMCO4         | RAB28         | RFX3         | MRPS7       | 630  | CHRD          | ZBED5        | ALDOB        | ALDOB         |
| 131  | KDELRL1       | MAP4K3        | OSBPL1A      | UBE2I       | 631  | ASB10         | GORAB        | ALKBH8       | RUFY1         |
| 132  | IGFLR1        | PKN2          | UGT2B7       | GNA12       | 632  | OPA1          | PDHX         | POLA1        | SNRPC         |
| 133  | LPCAT1        | ETFBKMT       | PHYH         | GTPBP4      | 633  | YTHDF1        | SLC24A1      | IVD          | CISD3         |
| 134  | SCN1B         | KLHL24        | SH2D1B       | TAF6        | 634  | RIDA          | CEP170       | RPS23        | SMPD2         |
| 135  | PCDH15        | SH3GLB1       | METTL7A      | CDK5        | 635  | CD81          | C18orf54     | FBXO2        | DDOST         |
| 136  | GGT5          | SPATA4        | IDH1         | C3          | 636  | EPM2A         | ME1          | TSPO         | EXOC3         |
| 137  | ABHD11        | RGPD6         | MMACHC       | VAT1        | 637  | LYPLA2        | TLE5         | HTRA1        | TK1           |
| 138  | PDE10A        | LCOR          | CPN1         | NOMO1       | 638  | DDO           | ZNF283       | SCAMP1       | UBXN6         |
| 139  | PSD2          | MICU3         | IL12RB2      | SLC38A3     | 639  | LRR37A3       | CPNE8        | XPO7         | EMD           |
| 140  | TTL13         | PDCD1         | FGB          | GLS2        | 640  | CROT          | PNCK         | ACTR3C       | PDRG1         |
| 141  | CDC42EP1      | ZNF518A       | AQP11        | CIZ1        | 641  | UBA7          | C8orf48      | TLK2         | SYF2          |
| 142  | TUBA1C        | RAB11FIP2     | SEC61G       | CLIP2       | 642  | LYPLA2        | YPEL2        | MECOM        | SEN3-EIF4A1   |
| 143  | HPCA          | CDK6          | SOC55        | C1orf174    | 643  | PRSS36        | NPAT         | PPP1C8       | XRCC6         |
| 144  | SNAPC2        | PTPN12        | IDH3A        | AGTRAP      | 644  | SYTL3         | ZNF135       | CYP4F12      | ADSL          |
| 145  | SLC2A8        | SGMS1         | PYGL         | SDF4        | 645  | SIGLEC1       | BLZF1        | GPR153       | STX5          |
| 146  | GYP4          | RAB40C        | HNRNPA3      | PRR13       | 646  | VEP           | RNF4         | CCT6A        | SCAF1         |
| 147  | STRIT1        | ZMYM4         | KLRC3        | AFM         | 647  | SLC12A6       | CMTR2        | DNAJC21      | GOLM1         |
| 148  | RUNDC3B       | IFRD1         | SLC22A1      | PKN1        | 648  | YBX3          | MYBL1        | ADH4         | GGCT          |
| 149  | SIAH2         | TBC1D15       | EIF4E        | TRIM28      | 649  | WDR38         | FSHR         | MTHFD2L      | CD47          |
| 150  | PLEKHA8       | C1GALT1C1L    | TPMT         | PARD3       | 650  | CCDC102A      | TTC26        | SLC19A3      | PAFAH1B3      |
| 151  | A1CF          | SEN6          | PALMD        | SRSF9       | 651  | PDIA6         | RLG1         | ADAMT59      | WDR72         |
| 152  | FAM214B       | RWDD3         | CLYBL        | LDHA        | 652  | LDHA          | SMC5         | CBS          | AKIP1         |
| 153  | IQCD          | LAYN          | C9           | ALDOA       | 653  | SPINK2        | ACAP2        | RLIM         | ST6GAL1       |
| 154  | ADH6          | MARCHF8       | RABAC1       | MANBAL      | 654  | RBMA2         | ZNF257       | JTB          | ANAPC11       |
| 155  | ALDH3A1       | NT5C1B        | GGH          | AIMP2       | 655  | APOBEC3A      | DIXDC1       | NCKAP1       | CAT           |
| 156  | DOHH          | LDB1          | FNDC5        | UBXN1       | 656  | PSPH          | POU6F2       | NCALD        | ORC6          |
| 157  | SPON2         | WDSUB1        | RAB15        | BTF3L4      | 657  | NCL           | SP100        | DPY5         | B4GALT3       |
| 158  | P2RY6         | TIMM23B-AGAP6 | DEGS1        | PPP1CC      | 658  | EFEMP2        | ACSM6        | HOMER3       | IGF2BP3       |
| 159  | MAN1B1        | PPP3CA        | IL13RA1      | CHCHD6      | 659  | C7            | LEKR1        | IGFBP3       | PTMA          |
| 160  | ENPP3         | RAP1A         | PGF          | MZT2A       | 660  | MFS5D10       | PPWD1        | PTTG1        | PIGS          |
| 161  | CALR          | MFS14A        | KANK4        | NUP93       | 661  | SLIT3         | CRBN         | ARRDC4       | AP2B1         |
| 162  | GTF2F1        | MED17         | SERPINA10    | POLD1       | 662  | ZNF428        | KIAA1586     | GADD45B      | RPL36A        |
| 163  | EEF1A2        | ANKRD13C      | SRSF5        | LSM12       | 663  | SMOX          | RABGAP1L     | GIPC2        | LLPH          |
| 164  | IQGAP2        | MIER1         | ALDH1B1      | CALU        | 664  | DRC7          | AK9          | RYR3         | CD63          |
| 165  | HPD           | WASHC2C       | TIFA         | AARS5D1     | 665  | CST3          | FZD6         | OSTF1        | RBFA          |
| 166  | CCN2          | FBXW2         | CLU          | EIF3F       | 666  | ATP6V1G2      | BRCC3        | PHACTR4      | RP1A          |
| 167  | REC8          | CCDC90B       | TCEAL7       | ACYL        | 667  | P3H3          | ZNF684       | NHSL1        | KPNA6         |
| 168  | ASPHD1        | ZNF644        | TCEA3        | RPL35A      | 668  | ADAMTS16      | NEK11        | NGRN         | TTC39A        |
| 169  | GPR89A        | SLC18B1       | PGRMC2       | GNB1        | 669  | SLC3A1        | ZNF529       | CADM1        | FAM120C       |
| 170  | GPX2          | ZDHHC21       | LHPP         | PLOD1       | 670  | PDIA4         | STX17        | SLC13A5      | PRPF31        |
| 171  | GSTP1         | WFDC2         | DHRS13       | DCTN1       | 671  | GPX2          | KMT5B        | ARMC6        | TMEM98        |
| 172  | BIK           | LIG4          | ANKS4B       | ATP9B       | 672  | EGLN3         | PTPN20       | DNAJC28      | HNRNPUL2      |
| 173  | HSPB8         | PPM1N         | FAM13A       | RBMA2       | 673  | FBXO7         | PLEKHA3      | AMOT         | LEAP2         |
| 174  | FLOT2         | CDC50         | SLC2A3       | RPS15A      | 674  | FXN           | ZNF566       | SYN1         | MCFL2         |
| 175  | TTPA          | SRSF10        | BDH1         | RNH1        | 675  | MANF          | CGAS         | SOX7         | TNIP2         |
| 176  | CEBPD         | MAGEE2        | JAKMIP2      | POLR3K      | 676  | RRAS          | WDR37        | GMPS         | TSN           |
| 177  | KRTCAP2       | UBXN2A        | PLEKHA3      | BCL2L12     | 677  | GADD45B       | YY2          | AVL9         | RNF187        |
| 178  | CTSD          | BEX4          | CDK17        | LRRCS9      | 678  | HILPDA        | MIS18BP1     | SRPK2        | VPS4A         |
| 179  | C1QB          | TMEM30A       | AHSG         | CSNK1D      | 679  | APOH          | PCDHB12      | MXRA5        | LIMK1         |
| 180  | RNASE1        | MARCHF7       | BAALC        | RABAC1      | 680  | SLC10A2       | RXFP2        | PUS10        | PRDX5         |
| 181  | PEDS1         | ZNF44         | ADM          | HDAC1       | 681  | CRELD2        | STRIP1       | HMG82        | S100A9        |
| 182  | STBD1         | TANC1         | MIA3         | HDCC2       | 682  | LAMC3         | SYTL1        | PDZK1        | RNF220        |
| 183  | HPGD          | LURAP1        | RASIP1       | NOSIP       | 683  | RCOR2         | ZBTB21       | ZNF460       | SLC39A4       |
| 184  | SLC44A4       | STX2          | ANGPTL2      | PPP1R8      | 684  | CYP4F3        | ATAD1        | MRPL3        | MIB2          |
| 185  | C1QC          | FAXDC2        | SASH1        | PRMT1       | 685  | CHMP4B        | NAB1         | NECAP1       | KPNA4         |
| 186  | RTTN          | KDM4C         | PGM2L1       | ZNF775      | 686  | SVEP1         | DGCR6L       | EEF1B2       | CCL14         |
| 187  | SPRYD3        | MORC4         | ANLN         | TTC26       | 687  | MPV17L2       | REEP3        | RRP8         | MCRS1         |
| 188  | VPS33A        | ZNF451        | EFNA1        | TIMM17B     | 688  | RAE1          | CYTL1        | RPS25        | CLDN11        |
| 189  | PIGR          | IFIT5         | NT5DC1       | MRPL10      | 689  | ZFP36         | MASTL        | LRR3         | SLC7A2        |
| 190  | KATNAL2       | ZNF17         | PGLYRP2      | ZCCHC17     | 690  | R3HDM4        | RIC8B        | LSG1         | P2RX5-TAX1BP3 |
| 191  | ARL8A         | OB1           | CAPN5        | TMEM101     | 691  | TWF2          | SNRPN        | RBBP9        | GALNS         |
| 192  | PPFIA3        | EVIS          | KCNE3        | FAF1        | 692  | BBS12         | CAB39L       | SPRED1       | GLYATL1       |
| 193  | S100A1        | CAPS2         | ZNF22        | SLC9A3R1    | 693  | PISD          | SIKE1        | NME2         | ZNF593        |
| 194  | RAB4B         | CCL25         | SLC17A1      | AAMP        | 694  | B3GALT6       | JRKL         | SLC39A11     | DNASE1L3      |
| 195  | STX4          | AMMECR1L      | SLC14A       | RAB1B       | 695  | GLUD1         | ACSS3        | HNRNPL       | UROD          |
| 196  | BHMT2         | RYK           | MCC52        | HSDL1       | 696  | GPR162        | SLC25A24     | LCAT         | COP58         |
| 197  | EIF4A3        | CEP85L        | LRIG1        | UXT         | 697  | CAPN3         | SAMD9        | RPS18        | RAB13         |
| 198  | ENG           | PSIP1         | RDH5         | EIF2B5      | 698  | RGS9          | TEKT2        | NSRP1        | EIF4A1        |
| 199  | VAT1          | RGPD5         | KBTBD2       | TBRG4       | 699  | S100A2        | PPP6R3       | HAO2         | TBL1XR1       |
| 200  | TAX1BP3       | HACE1         | ACACB        | PSRC1       | 700  | SLC9A2        | RAB25        | RBM15        | PUSL1         |
| 201  | GATA6         | CRIM1         | FAM102A      | SND1        | 701  | WDR72         | CAND1        | RPS6         | FUS           |
| 202  | LRR6C1        | ZBTB1         | ADH1A        | RAC1        | 702  | A2M           | ZNF665       | TPCN2        | IGFBP6        |

**Table S1; Screening gene list by ICGC datasets.**

| Rank | Kidney Normal | Kidney Tumor | Liver Normal | Liver Tumor | Rank | Kidney Normal | Kidney Tumor | Liver Normal | Liver Tumor |
|------|---------------|--------------|--------------|-------------|------|---------------|--------------|--------------|-------------|
| 203  | FAM50A        | EPB41L2      | RDH14        | MZT2B       | 703  | ANKRD46       | KCNJ16       | KCNT2        | RP57        |
| 204  | NECTIN2       | TENT5A       | FAM3C        | SCRN1       | 704  | CORO7-PAM16   | SWT1         | CRN1         | ZC3HC1      |
| 205  | PUF60         | MROH6        | SLC38A3      | PFDN5       | 705  | NRSN2         | BNIP2        | MGAT4A       | CANT1       |
| 206  | CBX4          | PIH1D2       | MAPK14       | DBNL        | 706  | RET           | RNF133       | TFDP1        | STARD7      |
| 207  | SAR1B         | ZNF326       | SOAT1        | CDK14       | 707  | PXDC1         | POLK         | SHROOM4      | PPP1R7      |
| 208  | SLC52A2       | ZNF639       | WNT5A        | ARFIP2      | 708  | OSCAR         | ASCC1        | FAM83G       | PSMD13      |
| 209  | Csor4f7       | FAM768       | BRMS1L       | CLPP        | 709  | ZNF556        | GCC2         | PHLPP1       | GIT1        |
| 210  | TGFB1         | ZNF461       | VEZT         | RP59        | 710  | ANKRD53       | CELA2B       | FGFR1OP2     | RPL10       |
| 211  | LKAAEAR1      | FCHO2        | TMEM82       | RPL17       | 711  | NANS          | ZNF568       | TMEM14C      | RNF10       |
| 212  | JUN           | ZNF131       | SNAPC1       | BRD9        | 712  | SMPDL3A       | ERMAP        | GNL3         | GLG1        |
| 213  | EDEM2         | FSCN3        | RAB26        | COMMD9      | 713  | FAM83D        | CREB1        | ZMYND12      | CNTD1       |
| 214  | APOD          | FBXO11       | CA14         | PSMD3       | 714  | ICAM1         | RBMS2        | PTPN12       | ANP32B      |
| 215  | STAU1         | PTPN7        | C1orf112     | ZNHIT3      | 715  | PTOV1         | MCMBP        | PKD1L3       | DFFA        |
| 216  | SHISA5        | PRKD3        | ECHS1        | AMD1        | 716  | RBBP1         | ZNF33A       | LSS          | BAX         |
| 217  | IYD           | EXTL2        | MAMDC4       | LOX         | 717  | FIBP          | LRRC40       | LEPROTL1     | NECAP2      |
| 218  | RORC          | XPA          | NUDT6        | AP151       | 718  | TFE3          | NUP153       | NCAPG2       | MMGT1       |
| 219  | LPCAT3        | CNEP1R1      | AGTR1        | KDELR1      | 719  | ARHGEF19      | IPP          | SDHA         | PMUSD1      |
| 220  | NFKBIE        | TRMT13       | ITGB1        | MLLT3       | 720  | E1F4EN1F1     | STK38L       | SRPRB        | PPP5C       |
| 221  | GARS1         | PTPRD        | PLSCR1       | MIF         | 721  | FBXO9         | SPTY2D1      | BCAM         | SLC25A19    |
| 222  | PDGFB         | ZYG11B       | BTD          | SF3A1       | 722  | UBE2L6        | LUC7L2       | MAD2L1       | CCDC59      |
| 223  | ODF2          | RSRP1        | SLC25A42     | BNIP3L      | 723  | TBL2          | POLD3        | CEP170       | S100A10     |
| 224  | CNDP1         | ZMYM1        | OTC          | RPL24       | 724  | FAM149A       | GGTA1        | TRIM23       | ABCA9       |
| 225  | RPL28         | ZBED2        | PNPLA4       | ALKBH4      | 725  | RG514         | RSF1         | C2orf49      | ATP6V0B     |
| 226  | FBLN5         | IFT88        | SLC10A1      | GLTP        | 726  | MAP3K6        | PLK2         | TMEM87A      | MED27       |
| 227  | KPNA2         | ZNF431       | RAPH1        | HMGGA1      | 727  | HLA-DRB1      | DR1          | PSPC1        | MIF4G       |
| 228  | HACL1         | STAM         | CCNH         | PSMD9       | 728  | CDH5          | VMP1         | SAA2         | TRDMT1      |
| 229  | AOC3          | ADAMTS3      | CYP2A6       | GPD2        | 729  | PLOD3         | GOLGA1       | SLC2A1       | POMZP3      |
| 230  | MAP7          | CCDC82       | NIT1         | CHCHD2      | 730  | EGR1          | SPRING1      | OSGIN1       | C18orf54    |
| 231  | DNASE2        | MSL3         | AFMID        | C4orf3      | 731  | SLC35C2       | TSPLY5       | FNTA         | AGPAT1      |
| 232  | MPC1L         | ST7L         | RPL31        | SBBP1       | 732  | C11orf54      | CBFB         | SLC30A5      | DDIT3       |
| 233  | EDN2          | AGTPBP1      | SAA1         | LVRM4       | 733  | STON2         | PUM2         | PCDH4        | CNOT1       |
| 234  | MAPK10        | ABITRAM      | THSD4        | SNAPC1      | 734  | URM1          | CCNY         | PCDHGB4      | REXO4       |
| 235  | SHFL          | MCL1         | PTPN2        | SPAGA       | 735  | NUGGC         | TCTN3        | PNPO         | RPL37A      |
| 236  | BCL2L14       | GPR137C      | FGA          | FLYWCH2     | 736  | RCN3          | WAC          | NDUFA4L2     | METTL2A     |
| 237  | CKAP4         | NOC3L        | RIOK2        | TRAPP3      | 737  | SHKBP1        | NRAS         | LEO1         | RBMX2       |
| 238  | ROBO4         | DENND4C      | CBR1         | THAP11      | 738  | PCSK2         | DNAJC11      | EXOC6        | TSSC4       |
| 239  | PSME1         | ZNF718       | ENPP3        | TBL2        | 739  | TMEM214       | ACE2         | STAB1        | ANAPC7      |
| 240  | PRND          | C1orf52      | RBPA         | AP2M1       | 740  | NOL4          | TLCD1        | PRR11        | ACD         |
| 241  | ZSWIM4        | PRKCI        | TLE3         | MAN1B1      | 741  | WNT5B         | MIGA1        | CEBPA        | ATP6V1H     |
| 242  | KIAA0930      | MTRNR2L3     | F2R          | ORAI1       | 742  | FTSJ1         | TTC17        | ZNF639       | CMTM3       |
| 243  | ASRGL1        | OSBPL11      | ALDH1A1      | RPS16       | 743  | ARAF          | TGFBRAP1     | AGT          | MRTL28      |
| 244  | ETV4          | SANBR        | FOXP1        | TMEM39B     | 744  | ACOT13        | DHX36        | KCNMB4       | COL18A1     |
| 245  | PBLD          | TUBE1        | LDHD         | TTC4        | 745  | SNX5          | INPP5F       | DPY19L3      | CLU         |
| 246  | HMCN2         | INIP         | EHHADH       | IER3IP1     | 746  | WNT16         | GNAQ         | CCDC9        | SMAD2       |
| 247  | PFN1          | CDK17        | BCLAF1       | SLC38A4     | 747  | RAB7A         | CCDC65       | SULF1        | BLVRA       |
| 248  | PRCC          | APBP2        | FMO4         | HSPBP1      | 748  | RGPD8         | DDIT4        | DIS3         | ERP29       |
| 249  | TICAM1        | TENT2        | BAIAP2       | FAR5B       | 749  | ACMSD         | ZNF555       | CALU         | CYP4V2      |
| 250  | PUS1          | MTF2         | PEL1         | RBM14-RBM4  | 750  | OTOGL         | CLHC1        | EPB41L5      | TPD52L2     |
| 251  | MX1           | PLEKHF1      | CDKN1B       | PSMD2       | 751  | CDIPT         | IPO8         | RIT1         | ITIH4       |
| 252  | LILRB3        | CD302        | MAP7D3       | PPP1R14B    | 752  | FARP1         | PMS2         | TNFRSF11B    | KIF2C       |
| 253  | MAP3K14       | FASTKD1      | FUT1         | EME1        | 753  | MAGED1        | MSL2         | LIMK2        | RNF40       |
| 254  | RNF167        | CEP78        | PEPD         | CKS1B       | 754  | PTPA          | TCP11L2      | SNRK         | CYB5R1      |
| 255  | CDK14         | RFX3         | GPR4         | DPDC        | 755  | SETD9         | MPDZ         | CYP2C18      | TEAD2       |
| 256  | SUMF2         | MBNL2        | ACSM2B       | CORO1C      | 756  | PTPN6         | VKORC1       | CAPZA2       | MDH2        |
| 257  | NEU1          | DCAF16       | SGTB         | RNF145      | 757  | ADORA1        | OXR1         | SLC45A3      | ZDHHX18     |
| 258  | CSF1R         | CPSF6        | GPD2         | LSM5        | 758  | CARS1         | FAM76A       | TMEM128      | DENR        |
| 259  | SCNM1         | REV1         | GPT          | ETV1        | 759  | SCAMP3        | EFHC2        | PFKFB2       | GADD45GIP1  |
| 260  | CMTM7         | ZSWIM6       | CX3CL1       | GATC        | 760  | PLD2          | SRSF2        | F13B         | ZC3H13      |
| 261  | CFD           | PLA2G4A      | ACTN1        | BAMBI       | 761  | ADCK1         | DYNC2L1      | EOMES        | CDO1        |
| 262  | SERPINB1      | RNF138       | HNF1A        | DNAJC8      | 762  | GCLC          | TAS2R4       | CYP2B6       | RCE1        |
| 263  | BUD23         | ZNF223       | DHX15        | LRRC61      | 763  | CETP          | CSTF2T       | CDC45        | APOC2       |
| 264  | NPIP15        | ZNF738       | SLC39A1      | HNRNPL      | 764  | OSBPL1A       | BCAS2        | GCKR         | PSMD8       |
| 265  | SEPTIN4       | MAP3K7       | KPNA4        | BRMS1       | 765  | SDC3          | GTF3C4       | FAM3B        | PPP1R2      |
| 266  | SLC16A3       | FAM214A      | GCDH         | CNGA1       | 766  | MESP1         | CD7          | TMEM182      | PITG1       |
| 267  | MTTP          | CIBAR1       | PKLR         | CUL4B       | 767  | ITGA3         | VEZF1        | EDEM1        | ESM1        |
| 268  | NUDT6         | TAF5         | SLC46A3      | RBM4        | 768  | KPTN          | PRRG1        | ZNF329       | TMUB1       |
| 269  | KLHDC8B       | SNIP1        | F7           | ER13        | 769  | ADM           | PCF11        | TSG101       | PYCR1       |
| 270  | HLA-A         | NFKB1B       | ZNF436       | TSEN34      | 770  | CRYBB1        | BUB3         | ODC1         | LSM7        |
| 271  | SLC35C1       | SOGA3        | ZGPAT        | RALY        | 771  | VWA8          | GCNT2        | OSTM1        | SRI         |
| 272  | CDKN2D        | TMEM170B     | SLC22A7      | TUBA1C      | 772  | GSPT2         | NAP1L5       | GOLPH3       | RPL7A       |
| 273  | MVK           | FRS2         | TMEM30A      | LAMTOR1     | 773  | USP39         | RANBP10      | ACSL6        | RPL28       |
| 274  | NMB           | GPBP1L1      | ASPDH        | NKAP        | 774  | SLC15A3       | E1F3A        | SLC39A14     | FIS1        |
| 275  | PVR           | ZNF597       | TANC1        | TOMM7       | 775  | XYLB          | THOC5        | TNFAIP8L1    | HRAS        |
| 276  | PNKD          | TMEM163      | MZT1         | GRWD1       | 776  | MTCH1         | PLSCR4       | CSGALNACT2   | RPL39       |
| 277  | WARS1         | CNOT2        | KITLG        | NUTF2       | 777  | APOL1         | ZNF600       | PRC1         | MYPOP       |
| 278  | E1F1          | BTRC         | NT5C2        | RBM45       | 778  | CEBPB         | TTC23L       | PRG4         | LSM2        |
| 279  | GAS2          | MTFP1        | TNC          | SMARCD1     | 779  | TP53I3        | MYNN         | CREM         | SLC16A3     |
| 280  | TMEM179B      | USP1         | PAK2         | FBL         | 780  | GMPPA         | GTPBP2       | SLC16A6      | DAZAP2      |
| 281  | WDR4          | ARGLU1       | RTN4         | TUBA1B      | 781  | TULP2         | ING3         | CYP4F3       | CCDC51      |
| 282  | BPHL          | PLSCR1       | LMNB1        | UPP1        | 782  | MBOAT7        | PPP1R15A     | SLC16A13     | ENO2        |
| 283  | HNRNPL        | ABHD14B      | XYLB         | SAE1        | 783  | TBC1D10B      | STAM2        | GZMH         | NAT10       |
| 284  | COP2          | TRIM22       | TMEM139      | RRAGD       | 784  | SEMA4D        | DENND2C      | GREB1        | OIT3        |
| 285  | DEPDC7        | BATF         | KIF2C        | DNM1        | 785  | MUL1          | ZNF43        | SPTBN2       | IFI27L2     |
| 286  | INTS15        | FAM13B       | PRKAR1A      | CLTA        | 786  | MS4A8         | UACA         | CNKSR2       | MRPL45      |
| 287  | MAP7D1        | BMI1         | SEMA4G       | SPPL3       | 787  | USP30         | ZNF674       | NMT1         | TOMM22      |
| 288  | DDX27         | MITD1        | C4orf19      | NDRG1       | 788  | ADAMTS2       | ZNF607       | BTG3         | RPL18       |
| 289  | APBB1IP       | HECA         | SLC5A6       | DDX23       | 789  | TRPN          | RNASEL       | TNS3         | DNPEP       |
| 290  | EPHA1         | TTL11        | HP           | GYG1        | 790  | RTL8C         | ZNF610       | UBE2B        | ZBTB17      |
| 291  | NMRAL1        | LAG3         | BPHL         | PARG        | 791  | TMBIM6        | TMPRSS11D    | TWF1         | VPS26A      |
| 292  | MFSD2A        | C2orf73      | DHODH        | ATP6V1D     | 792  | NAGK          | SDHAF1       | PCDHGA8      | SLC39A1     |
| 293  | CD101         | SLC35B3      | ORM1         | BCL7B       | 793  | CUTA          | ITPK1        | UHRF2        | RPL18A      |
| 294  | PPP1R1B       | ARLSB        | CAT          | CLIC1       | 794  | PIIF          | TFAM         | MPV17L       | TFPT        |
| 295  | GALNT16       | PCGF3        | ANO5         | MPP6        | 795  | PQBP1         | DENND5A      | SMTN         | MMP24       |
| 296  | MMP14         | FUBP1        | DNAH6        | FLOT1       | 796  | TMEM102       | STIL         | CFB          | P2RX4       |
| 297  | DPP3          | P4HA1        | CMBL         | INO80C      | 797  | FOXD4         | DST          | MRP55        | S1PR1       |
| 298  | P4HB          | CUL7         | DNAJB6       | RPL5        | 798  | TUFT1         | CCDC30       | CCDC102B     | ASNS        |
| 299  | DEPDC4        | SIRT1        | SEMA6B       | SSNA1       | 799  | GJD3          | CYCR3        | CDKN2D       | COMTD1      |
| 300  | GLYATL1       | HNRNPDL      | SNAPC3       | PIIH        | 800  | CTSF          | CARF         | CASKIN2      | MED10       |
| 301  | HOXA1         | ZNF440       | LIMS1        | CKS2        | 801  | AKIP1         | CLK4         | GTF2H1       | MRPL52      |
| 302  | PAF1          | DBR1         | GSTZ1        | SLC25A3     | 802  | SSRP1         | TRIM32       | OSMR         | MRPS33      |
| 303  | CITED4        | MDFIC        | SUOX         | SRM         | 803  | SLC16A10      | ADNP2        | MATR3        | CHCHD3      |

**Table S1; Screening gene list by ICGC datasets.**

| Rank | Kidney Normal | Kidney Tumor | Liver Normal | Liver Tumor | Rank | Kidney Normal | Kidney Tumor | Liver Normal | Liver Tumor |
|------|---------------|--------------|--------------|-------------|------|---------------|--------------|--------------|-------------|
| 304  | SIGLEC7       | ZNF426       | SEMA4C       | PSMC3IP     | 804  | SFN           | RIN2         | IFI16        | NAA10       |
| 305  | XPO6          | STXBP3       | EPHA1        | VAMP3       | 805  | HELZ2         | DCUIN1D1     | CYP4V2       | DPF2        |
| 306  | CA2           | SPIN1        | RPL35A       | MTFN        | 806  | BYSL          | TXLNG        | PCYT2        | PGP         |
| 307  | OVCH2         | WDR44        | GNNG10       | MRPS34      | 807  | REEP4         | SLAIN2       | LDLRAD3      | TRIM47      |
| 308  | RRH           | TBCEL        | AK4          | MRPS23      | 808  | CD4           | CDC425E1     | ANGPTL3      | DNASE2      |
| 309  | CYP21A2       | WDR19        | STC1         | MRPL20      | 809  | CHIT1         | ZNF611       | EI24         | VMA21       |
| 310  | SLC48A1       | PXYLP1       | EXOSC7       | RUVBL2      | 810  | PDAP1         | CEP135       | TAF1D        | ERGIC3      |
| 311  | SPOCD1        | BBOF1        | EXT1         | VTN         | 811  | TRPM3         | MLLT10       | KDELRF3      | GDE1        |
| 312  | MUC3A         | ZNF761       | APPL1        | PSMG3       | 812  | NA            | WDR75        | TM9SF3       | E2F6        |
| 313  | CAMK2G        | MAPKAPK5     | TRNT1        | TRIP13      | 813  | GK3P          | ZFYVE9       | IFNGR1       | SUPT3H      |
| 314  | YIPF3         | PANK2        | TRMT11       | RNF7        | 814  | NUDT13        | DBF4         | SPP2         | CCDC9       |
| 315  | JMJD6         | ZNF519       | ZBTB7B       | TMEM147     | 815  | INSYN2B       | SKP2         | LAMA4        | TMEM69      |
| 316  | FJX1          | GNPDA2       | RAB27A       | SLCO1B1     | 816  | DHFR          | RBM43        | GALM         | BAD         |
| 317  | LY6E          | PLAG1        | COP3         | BOD1        | 817  | CSP1          | GLIS3        | PLSCR4       | DYNLRB1     |
| 318  | CNPY3         | HSPBP1       | AKR1C2       | RNF149      | 818  | RASGEF1C      | SAR1A        | FBXO4        | GTF3C5      |
| 319  | RGPD4         | ZNF615       | ALAD         | CCDC124     | 819  | PIK3IP1       | GNNG12       | CSTF2T       | PSMD10      |
| 320  | MTA2          | SESTD1       | SLCO2B1      | C1RL        | 820  | HSPB6         | HELLS        | FAM91A1      | HDAC2       |
| 321  | FEV           | SMARCAL1     | RAC3         | CC77        | 821  | DAGLB         | GABRA3       | AKIRIN2      | PELL3       |
| 322  | WDR1          | ZNF175       | RPL22L1      | PPP2R1B     | 822  | ABCA12        | KCTD18       | BNIP3L       | AMZ2        |
| 323  | DUSP5         | FMNL2        | STRADB       | NACA        | 823  | APEX2         | ZNF333       | MRC1         | G6PC3       |
| 324  | DNASE1L3      | SUPT7L       | FAM177A1     | PLK1        | 824  | ENTPD6        | PARD3        | SLCSA9       | CA11        |
| 325  | LUZP2         | CD8B         | FGFR1        | CTU1        | 825  | RNF152        | NA           | TRAPPC4      | TUBG1       |
| 326  | PPP1R16B      | RBBP6        | GPAM         | LRTOMT      | 826  | VWF           | CCDC171      | CRYM         | RAD54L      |
| 327  | KYNU          | EPS15        | ENO3         | DDIT4       | 827  | C1QTNF2       | HESX1        | RAP1GAP      | SEPH51      |
| 328  | IFITM2        | SOX11        | SMO          | CBX3        | 828  | HERC5         | CEP120       | NAGS         | PTGES2      |
| 329  | TMEM39B       | MOSMO        | ACOX1        | SSTR2       | 829  | CCDC85C       | CCNT2        | THPO         | GAR1        |
| 330  | VWA1          | ZNF432       | ABCG1        | RPL13A      | 830  | YARS1         | ZNF148       | LSM10        | FNDC3B      |
| 331  | PYGL          | ADGRG6       | TOR1A        | NUP205      | 831  | C6orf47       | AQP6         | HAMP         | C12orf75    |
| 332  | HSPD1         | NT5C2        | ECI2         | PEF1        | 832  | NAGPA         | TNFSF15      | NRARP        | CSTF2       |
| 333  | PLAAT2        | DOCK4        | RPS29        | DAP         | 833  | MEGF11        | SMURF2       | BOK          | UPF3B       |
| 334  | CAMK2A        | ANKLE2       | GCLC         | CCT2        | 834  | SLC11A1       | DGKI         | CHUK         | NC51        |
| 335  | SH3BP1        | SPTLC1       | DDX47        | NAP1L4      | 835  | GGT7          | ZEB2         | LZTFL1       | NCS1        |
| 336  | RMND1         | EXOSC10      | TMEM63B      | RPL19       | 836  | CD276         | BBX          | SSB          | RPS19BP1    |
| 337  | SRF           | GTF2H1       | MAPK8IP1     | ATP6V0D1    | 837  | ARL14         | SLX4IP       | TMEM39A      | CDKN2A      |
| 338  | GFRA1         | RIC1         | TM7SF2       | GPATC3      | 838  | PMP22         | HERC5        | DUSP22       | CRHBP       |
| 339  | TRAF2         | ZRANB1       | PLAGL2       | STAR3NL     | 839  | ZNF385A       | FGD6         | PRR5L        | TACC3       |
| 340  | BCL3          | KLF11        | SLC23A3      | GHDC        | 840  | LRWD1         | NCOA7        | SKP2         | GSPT1       |
| 341  | PCYOX1        | COQ7         | DNAJC12      | SKA1        | 841  | PYCR1         | ABRAXAS1     | RPL26L1      | SERPINB1    |
| 342  | CD14          | SGMS2        | NSUN3        | PES1        | 842  | DTX2          | SRSF1        | NCOR1        | RAD51       |
| 343  | ATG13         | CDIC7        | CD109        | DDX10       | 843  | OTUD5         | PGM2         | ZNF385B      | MRPL47      |
| 344  | CCT6B         | INVS         | CLEC2B       | METTL5      | 844  | FOSL2         | PPIL6        | HAO1         | BAZ1B       |
| 345  | HCK           | G6PD         | NNMT         | CKAP4       | 845  | STX19         | DNAJB14      | RBMS1        | MTF         |
| 346  | IL11          | IQB          | ASRGL1       | TUBA4A      | 846  | RANGAP1       | SLC38A3      | CENPF        | ORM1        |
| 347  | QSOX1         | BTBD8        | RAB21        | TNFSF14     | 847  | NUDC          | PRDM5        | CYP2C8       | RF2         |
| 348  | ADCK2         | SLC9A6       | ESAM         | RAN         | 848  | AFTPH         | OCEL1        | BNIP2        | NME6        |
| 349  | CACNA2D2      | SLC30A7      | GJB1         | BIRC5       | 849  | EML3          | WDR31        | JOSD2        | HDGF        |
| 350  | TMPRSS11E     | SRPK2        | CHN2         | CENPW       | 850  | PIERC1        | BTF3L4       | MCOLN1       | NCAPG2      |
| 351  | C1R           | ANXA1        | CELSR1       | PCBP2       | 851  | B3GAT3        | ZNF235       | ACSM2A       | RPS29       |
| 352  | TRIM11        | DDX58        | AP4S1        | PHF13       | 852  | UNC5CL        | FILIP1       | RG51         | GNP2        |
| 353  | METTL3        | GPATCH2      | HIF1A        | C1orf122    | 853  | VAMP5         | STAR9D       | OVGP1        | RPS10       |
| 354  | NEURL3        | ANKRD53      | HINT1        | GD12        | 854  | GD12          | AGAP4        | BHMT2        | MPZL1       |
| 355  | PPP2R1A       | C1orf105     | SERPINA3     | SPNS1       | 855  | PSMB8         | ZBTB6        | SYPL1        | TACC2       |
| 356  | RRP12         | KLHL36       | NGDN         | TMEM199     | 856  | MYOM2         | ZNF449       | IL6R         | RPS2        |
| 357  | REP15         | RABL2A       | RAD21        | XPO6        | 857  | TIMM29        | ANKRD36      | TMEM33       | NXN         |
| 358  | ADGRG3        | FBXL2        | IER3IP1      | LRWD1       | 858  | SNF8          | SPDYA        | INPP4B       | ELOVL1      |
| 359  | EFNB1         | ADGRA3       | EPHX2        | DDB1        | 859  | B3GNTL1       | ZNF184       | CCNB2        | PLXNA1      |
| 360  | ASPA          | ZNF256       | ADH6         | CLSTN1      | 860  | CLDN14        | B3GALT9      | ACTR10       | CUL2        |
| 361  | MIDN          | GPR75        | TPST1        | WRAP73      | 861  | CC2D1B        | NOL8         | GPR39        | METTL1      |
| 362  | UNC119        | TM6SF1       | GOT1         | ARPC1B      | 862  | SOD2          | STAMBPL1     | CBFA2T3      | FARSA       |
| 363  | C1RL          | CSGALNACT2   | TMEM45A      | CCT4        | 863  | OSMR          | ATF2         | C12orf57     | WRAP53      |
| 364  | G6PC1         | LPAR6        | SEC14L1      | SLC39A6     | 864  | CUEDC2        | RAB18        | TRIM37       | NHP2        |
| 365  | RNF113B       | ZFX          | SYBU         | MCM7        | 865  | BABAM2        | RANBP3L      | COL18A1      | PDCDC6      |
| 366  | UCP1          | ZNF200       | PAIP1        | UBL4A       | 866  | CD209         | ZNF41        | LYNX1        | DIP2B       |
| 367  | AS3MT         | LOXHD1       | COMMD10      | RNPS1       | 867  | SRM           | IFT74        | POLD3        | C18orf21    |
| 368  | DPM2          | EOGT         | LECT2        | TNPO3       | 868  | CLEC11A       | B3GALNT2     | RIN2         | KIN         |
| 369  | KDELRF2       | TYR          | TBX15        | PHC2        | 869  | FANCC         | ASB2         | LRP12        | GNPDA1      |
| 370  | ZMYND15       | ABCA5        | STS          | ERAL1       | 870  | SHB           | METTL15      | PFND4        | BOLA3       |
| 371  | DPF3          | PPP1R3B      | PPP1R3B      | RPL6        | 871  | CAV3          | FAM126B      | NARF         | SLC3A2      |
| 372  | BMP1          | ERLIN1       | FBXO5        | TSC22D4     | 872  | PTGFR         | PLEKHA1      | ATAD3C       | RUNDC1      |
| 373  | KLHL38        | ZNF493       | PLEKHB2      | RP9         | 873  | PRKD2         | OSGEP1       | YIPF1        | CFHR1       |
| 374  | BASP1         | DUSP9        | MSRA         | NOL7        | 874  | SH3RF3        | ZC3H12B      | PGGT1B       | RPLP0       |
| 375  | CFAP276       | GAN          | ST3GAL4      | KIAA0930    | 875  | RPS6KL1       | TTL          | ZFP1         | ANKLE2      |
| 376  | VSTM2B        | TLCD4        | PFND2        | GSK3A       | 876  | REG3G         | TLL1         | PLRG1        | RACGAP1     |
| 377  | CACFD1        | IST1         | NLGN4X       | APLN        | 877  | PLPP2         | RLF          | GAS2         | PHLDA2      |
| 378  | AGMAT         | ADNP         | ATP2B4       | DKC1        | 878  | ATF5          | SLC6A1       | SRP14        | PGD         |
| 379  | CCDC9         | RPP30        | PCDH17       | DIABLO      | 879  | PIWIL2        | SULT1C4      | DDX10        | NDUFA10     |
| 380  | PLAUR         | CC2D2A       | SLC2A4RG     | NME1        | 880  | SMIM12        | SHPRH        | PCDH85       | ADRM1       |
| 381  | FOLR2         | ERCC6        | ALDH7A1      | RHEB        | 881  | PLAAT5        | C21orf62     | WIP2         | KDSR        |
| 382  | BCL7B         | YDJC         | FN3K         | PABPC4      | 882  | HCLS1         | SGTA         | THNSL1       | NUP37       |
| 383  | TMEM115       | RNPC3        | NOP58        | LONP1       | 883  | PANK1         | PGM3         | MTX1         | AFG3L2      |
| 384  | THADA         | ZBTB49       | CHSY1        | RBM17       | 884  | HCFC1R1       | RAB21        | SLC25A23     | RAD51B      |
| 385  | VPS18         | PLAA         | SNRPE        | SRRM5       | 885  | CCKBR         | DPH2         | TRIM26       | PAF1        |
| 386  | GMDS          | DHX15        | SOD2         | CCDC127     | 886  | HRAS          | SCN11A       | JAK1         | SF3A3       |
| 387  | ZP2           | ERCC6L2      | KLHL25       | NEU1        | 887  | VSTM1         | DEF6         | TPD52L1      | CFHR3       |
| 388  | DMRTA1        | EPC1         | GLS2         | CDC20       | 888  | EEF2KMT       | BBIP1        | EAF1         | B3GAT2      |
| 389  | LIAS          | ERVFRD-1     | TM2D3        | CC75        | 889  | CLDN7         | RBM18        | GNA13        | POC1A       |
| 390  | RNF187        | RB1CC1       | AMBP         | TOMM40      | 890  | PARP12        | ZNF736       | LTV1         | NUP35       |
| 391  | ASB15         | FAS          | COG5         | RPS3        | 891  | GRIK4         | ELP1         | VNN3         | PHF14       |
| 392  | TYMP          | SPIN4        | GNPDA2       | SSB         | 892  | CDKN1A        | CCDC89       | RPE          | TCTN2       |
| 393  | C1QTNF1       | CWC22        | FAM149A      | TMEM54      | 893  | BEST4         | ABHD17B      | BTG1         | DDX56       |
| 394  | SOX9          | ZBTB11       | PHLDB2       | IMP4        | 894  | HABP4         | LZTFL1       | LNP1         | NGRN        |
| 395  | RARRES2       | FBH1         | TUBE1        | FCGBP       | 895  | FMNL1         | DET1         | PGS1         | RNF41       |
| 396  | DOK3          | GCLM         | HNRNPM       | VDAC2       | 896  | RGCC          | FSD1L        | HAUS1        | CNP         |
| 397  | HTRA3         | NEK7         | PACRG        | KCTD2       | 897  | BUD13         | ZNF540       | CALCRL       | PTPMT1      |
| 398  | CEP135        | ZNF766       | TMED9        | POM121C     | 898  | HBD           | FBXL3        | MCTP1        | GLD1        |
| 399  | NKAIN4        | AMIGO2       | VNN2         | ACOT7       | 899  | PLAT          | PTPRN2       | TEX10        | TRNP1       |
| 400  | TOR2A         | PIK3AP1      | RHOJ         | NKIRAS2     | 900  | KCNK10        | KBTD3        | AFAP1L1      | RAB6B       |
| 401  | PPP1CA        | GPR34        | GOLT1B       | TIMM50      | 901  | PDPN          | RAPGEF5      | PAFAH1B3     | RAB5C       |
| 402  | ULBP1         | SPOPL        | ETNK1        | CLEC3B      | 902  | HNRNPM        | BRAP         | ATL3         | ANKRD27     |
| 403  | ABCC2         | MTA3         | SAA2-SAA4    | OTUB1       | 903  | ATG16L1       | ADSS2        | RXRA         | ARF3        |
| 404  | INMT          | PHHLN1       | EIF4A3       | COPG2       | 904  | C10orf99      | MMS22L       | PRKAA1       | ARG1        |

Table S1; Screening gene list by ICGC datasets.

| Rank | Kidney Normal | Kidney Tumor | Liver Normal | Liver Tumor    | Rank | Kidney Normal  | Kidney Tumor | Liver Normal | Liver Tumor    |
|------|---------------|--------------|--------------|----------------|------|----------------|--------------|--------------|----------------|
| 405  | KCTD2         | SLC22A15     | DDX50        | PTDSS2         | 905  | PDIA5          | MECOM        | CYP3A43      | RIT1           |
| 406  | CHST12        | ARHGAP21     | ANO1         | IMPDH2         | 906  | ZDHHC1         | ZNF281       | ARSD         | C1QBP          |
| 407  | AKAP12        | SMAD5        | CDK5RAP2     | VPS37C         | 907  | ACOD1          | RANBP2       | IL18R1       | SLC35E4        |
| 408  | C14orf39      | CABCOC01     | GLYCTK       | TYRO3          | 908  | KXD1           | SLC23A2      | IRS1         | MYCT1          |
| 409  | SLC27A3       | C21orf91     | CEBPD        | AURKB          | 909  | SART1          | NPHP1        | LVRM4        | IL33           |
| 410  | KIF4B         | KIAA0825     | ARHGAP35     | IMPDH1         | 910  | FAM83G         | RBM24        | PCDHA13      | GSS            |
| 411  | CERS1         | ZNF347       | SLC25A1      | ALB            | 911  | FBXL5          | BMP2         | S100A13      | ANKRD40        |
| 412  | TM7SF3        | DENND1B      | SGK1         | MED19          | 912  | TENT5C         | RNF11        | ULK4         | CDKN2AIPNL     |
| 413  | KDM8          | ORC4         | CYP2A7       | RCC1           | 913  | TIMP1          | PHF20        | RNF2         | YWHAE          |
| 414  | ADGRG7        | TAB3         | IGFALS       | NPM3           | 914  | CFAP65         | XPO1         | RPS3         | RPL36          |
| 415  | FAM241B       | STAG1        | C9orf72      | EIF2AK1        | 915  | NALF2          | STXBP5       | CDIPT        | G8A            |
| 416  | AEN           | RAD18        | HES1         | TMEM14C        | 916  | MDFI           | NODAL        | UHRF1BP1     | STUB1          |
| 417  | TMEM54        | DNAJC27      | SS18         | PDC3L3         | 917  | SLC25A36       | PWP1         | CLNDN1       | PSMB6          |
| 418  | EIF3G         | IFI44        | TSPAN13      | RAB31L1        | 918  | C11orf96       | WDR26        | FETUB        | TLL12          |
| 419  | MCM5          | ZC3H12C      | TTR          | EIF3M          | 919  | PAQR4          | SLC25A36     | ACVR1C       | TAF3           |
| 420  | FOXQ1         | GAPVD1       | ENTPD8       | TMEM160        | 920  | SLC27A4        | ZNF182       | TSNAX        | TRIM24         |
| 421  | SH3BGR3       | SVOP         | UNG          | RPLP1          | 921  | PRKRIP1        | AVL9         | MED10        | FAM117B        |
| 422  | CRISPLD2      | ZNF354B      | RPS6KA5      | UNC45A         | 922  | ZC3H14         | KDM5B        | SCN1B        | RP2A           |
| 423  | PFKP          | DCLRE1B      | MYNN         | DCTN3          | 923  | AK1            | ABLIM1       | ST6GALNAC6   | DGUOK          |
| 424  | TMEM192       | LAIR2        | PAH          | NSUN5          | 924  | PREB           | WDR48        | CUL4B        | B9D2           |
| 425  | VPS28         | SLK          | SLC22A9      | TIPIN          | 925  | SH3BP5L        | BTBD3        | DOK4         | XDH            |
| 426  | NPR1          | TOPORS       | TESK2        | NFU1           | 926  | LGALS9         | PRKACB       | KIF20A       | TMEM51         |
| 427  | DZIP1         | RBMXL1       | NOL8         | SEN3           | 927  | USP5           | ZNF792       | CYP3A4       | KFBP14         |
| 428  | MAN2B1        | CEP126       | CPE          | RBM8A          | 928  | TREX2          | GTDC1        | PSMC6        | RAB3GAP1       |
| 429  | CXCL16        | HSD3B7       | TP53INP2     | COX8A          | 929  | KCNE5          | RM1          | MARCKS       | COMMD6         |
| 430  | RNF224        | NDST2        | SHMT1        | FCN3           | 930  | PGD            | C9orf72      | TNPO1        | NDUFA4         |
| 431  | RORB          | MINPP1       | ENTPD5       | SLC1A5         | 931  | ANP32B         | ABHD14A      | CYP4A22      | EXOSC7         |
| 432  | UBE2L3        | ZNF91        | SYNE2        | MTHFD1L        | 932  | ACAD11         | CHMP6        | ESD          | WASL           |
| 433  | GGACT         | ORC2         | RPS21        | SRC            | 933  | IDNK           | GPA33        | TMEM50A      | ZNF441         |
| 434  | PRAM1         | ZNF136       | PEX19        | KCNJ15         | 934  | GALNT14        | MCM9         | MED20        | VPS35          |
| 435  | C3orf49       | EIF2AK2      | GRHPR        | POLR2G         | 935  | PTGS2          | SGK1         | FUT11        | SYNGR2         |
| 436  | EFTUD2        | MOV10L1      | ARL4D        | PIN1           | 936  | C10orf67       | MAS1L        | DYNLT3       | RAB35          |
| 437  | DDA1          | ASXL1        | TEAD2        | SSRP1          | 937  | ARPC1B         | WN7B         | FGFR1L       | ITGB5          |
| 438  | RAB40B        | PARP8        | ATAD1        | BMP6           | 938  | PHGDH          | CBWD3        | SRGAP1       | AMIGO2         |
| 439  | EFNA4         | TM9SF3       | CDK1         | B4GALT7        | 939  | SLC22A4        | LEPROT       | NETO2        | ATG3           |
| 440  | OAT           | SLC16A12     | BTBD1        | PROZ           | 940  | NKIRAS2        | CCDC68       | MSMD1        | CEACAM19       |
| 441  | LMAN2         | PBX1         | YARS2        | HAUS1          | 941  | COL1A2         | CELF1        | REPS2        | CSNK2A2        |
| 442  | SELP          | CCDC93       | TCF12        | FKBP9          | 942  | YWHAB          | EGR2         | NUDT3        | GNL1           |
| 443  | ARPC4         | DDX20        | FGG          | PARL           | 943  | REN            | MSH2         | HNRNPA2B1    | APOC4-APOC2    |
| 444  | IL12RB2       | SHLD2        | NCK1         | GINS3          | 944  | GPR137         | FRP3         | DHX9         | F7             |
| 445  | CAPNS1        | RAD9B        | PAPPA        | NPC1           | 945  | ELAVL1         | SUN1         | PCDHGC3      | ATG9A          |
| 446  | SDF2L1        | FPGT         | DHTKD1       | AACS           | 946  | HEYL           | CNOT10       | BMPER        | NUDC           |
| 447  | BLMH          | FAM222A      | SHBG         | ARL4A          | 947  | OAZ3           | CDKL2        | RAB18        | PDCD2          |
| 448  | SMARCB1       | ZBED9        | BLNK         | ZNF442         | 948  | C4A            | TRIM59       | PSMD6        | PKFB3          |
| 449  | SRRM3         | ZNF778       | RNF24        | C1S            | 949  | RPS6KA1        | KRT17        | PPP2R5A      | SNED1          |
| 450  | BCAP31        | DPH5         | PNPLA3       | MRT04          | 950  | TINAGL1        | ZNF530       | ZNF830       | ACTN4          |
| 451  | TRABD2A       | NOSTRIN      | SLC25A10     | NDUF83         | 951  | PRPF6          | CTNNA1       | ALDH18A1     | ARHGAP1        |
| 452  | AP2S1         | ZNF583       | DCXR         | JMJD6          | 952  | PNMA5          | OGFR1        | PANX2        | SNRPG          |
| 453  | NSFL1C        | ZNHIT6       | EIF1         | MRPL17         | 953  | LGR6           | AFTPH        | ZNF484       | SMARCB1        |
| 454  | TRH           | AEBP2        | APCS         | C8B            | 954  | G6PD           | GPCPD1       | CYP2J2       | TLK2           |
| 455  | CLN3          | NRG7         | RIF1         | DOHH           | 955  | MAD2L2         | PDS51        | RPL5         | SNRNP40        |
| 456  | TKT           | SYNGR3       | MYH14        | RPS27A         | 956  | C4B            | TPSG1        | ALDH3A2      | SRGAP2         |
| 457  | DIO1          | ZKSCAN7      | KHDRBS1      | MMD            | 957  | H2AX           | ABC810       | ZNF512B      | MAP1LC3B       |
| 458  | SERPINA6      | ASB3         | ARFGAP3      | MED22          | 958  | GRM8           | CCDC160      | SCRN2        | RPS19          |
| 459  | AIG1          | OTUD1        | SNRPD1       | SLC6A1         | 959  | MAFF           | ROCK1        | AQP9         | NAGPA          |
| 460  | ISM1          | FAIM         | NCOA1        | ARMC10         | 960  | POLA2          | WAS          | RPS12        | FIP1L1         |
| 461  | UBE2I         | HSD17B12     | PCBP1        | CBX1           | 961  | KRT80          | ZNF222       | ACAA1        | TBC1D22A       |
| 462  | GGT6          | RAB14        | PANK4        | LRRCC47        | 962  | RFXANK         | RNF2         | HMGCS2       | ITIH3          |
| 463  | PYGM          | ANKRD50      | CRNKL1       | TXNL1          | 963  | TRIM39         | DHX32        | ANXA7        | PSME3          |
| 464  | MRO           | TTC30B       | RGN          | ST3GAL2        | 964  | SF3B2          | TRA2B        | AMT          | MRPL48         |
| 465  | ENPP6         | NCAN         | ARID4B       | DYNLL1         | 965  | CHRNA3         | NMNAT1       | NDUFAF2      | NDUFA1         |
| 466  | KLFB          | MAP9         | RAPGEF5      | AXIN1          | 966  | RLTB8          | SLC5A4       | CWC22        | KIAA2013       |
| 467  | TLCD3A        | ZNF765       | EDNRA        | SPAG16         | 967  | ALDOA          | SEPSCE3      | TPT1         | SLC27A2        |
| 468  | TALDO1        | CCDC186      | LIME1        | GAPDH          | 968  | RNF175         | CEP44        | BACE1        | PHI1D1         |
| 469  | LRRCC28       | MIEN1        | ARMCX6       | ZNF428         | 969  | ALDOB          | ZNF614       | RPS8         | C5             |
| 470  | PIPOX         | CCDC148      | MTHFD1L      | PKMYT1         | 970  | FAM234A        | TMF1         | CAST         | TRADD          |
| 471  | GPAT3         | CNTLN        | POLE4        | MAGO8          | 971  | MFG8           | CSNK1G3      | CYB5D2       | RNF4           |
| 472  | SCARF2        | FCRL3        | PLEK3        | TMEM60         | 972  | KRT20          | THBS1        | SLC28A1      | HAX1           |
| 473  | NFAM1         | UBE2D1       | FCHO2        | HOMER3         | 973  | CDADC1         | C7orf31      | CP           | RRP1           |
| 474  | OLFML3        | CHORDC1      | MTRF1L       | TFEB           | 974  | IFI30          | TRIO         | CDH13        | CREB3          |
| 475  | PDE6B         | PPTC7        | UPRT         | TXNDC12        | 975  | ADA            | BOD1L1       | HMG83        | SMTN           |
| 476  | IDH1          | TSC22D2      | ABCC6        | EIF3D          | 976  | DPAGT1         | ZNF701       | RPS10        | OPN1SW         |
| 477  | EIF2B1        | ITSN1        | RAB13        | BRAT1          | 977  | DDX19A         | KLHL9        | VPS37A       | NDUFA13        |
| 478  | FARSA         | EFCAB13      | CALM2        | RPL36A-HNRNPH2 | 978  | LSR            | ARL6IP6      | ACY3         | EPH2B          |
| 479  | SERPINH1      | DYRK2        | GUCY1A2      | EXOSC10        | 979  | SLC10A3        | RASA1        | SLC30A7      | MST1           |
| 480  | NSDHL         | ATF1         | NFKB1B       | GALE           | 980  | PRNP           | NR1D2        | MAML3        | HNRNPUL2-BSC12 |
| 481  | MMP23B        | RNF34        | TBK1         | PHF19          | 981  | CCDC97         | KAT6B        | WARS2        | RFC4           |
| 482  | UBR4          | TAF1A        | AP1AR        | SNRPF          | 982  | APLP1          | USP46        | NR1I3        | AP2S1          |
| 483  | CYP4V2        | MS4A7        | AADAT        | ISY1           | 983  | PTPN18         | ZNF558       | HABP2        | MICALL1        |
| 484  | LCN2          | ZNF345       | DHCR24       | C11orf49       | 984  | NOPCHAP1       | DCUN1D4      | AS3MT        | N4BP2L1        |
| 485  | MMUT          | ZNF675       | UBE2S        | TMEM9          | 985  | NAT1           | SMARCAD1     | HK2          | MCAT           |
| 486  | SPINT1        | APH1B        | PPARA        | NOMB9          | 986  | TGM2           | TRIP12       | CD28         | RAB21          |
| 487  | SMARCD2       | MYO5A        | TCF4         | RPS5           | 987  | ACD            | SAMD13       | CLVS1        | RNASEK         |
| 488  | NT5E          | MAP3K2       | PREX2        | SHCBP1         | 988  | CAPZB          | CCDC6        | SGCD         | SET            |
| 489  | JPT1          | TAB2         | ABCG8        | NOC2L          | 989  | FCGR3A         | DYRK3        | VEGFC        | C12orf73       |
| 490  | ACAD9         | RC3H2        | ADRA1B       | SMARCAL1       | 990  | ESYT1          | MZB1         | MICU1        | CNPPD1         |
| 491  | CLDN3         | ZNF436       | SPRY1        | IGSF3          | 991  | FBXO10         | CNOT6        | HCN3         | GABARAPL2      |
| 492  | GHR           | RPGR         | SEC61B       | VPS41          | 992  | HSD3B7         | ZNF655       | PTPN9        | MRPL21         |
| 493  | MT2A          | BTN2A1       | DHFR         | SF3B2          | 993  | YWHAH          | N4BP2L2      | CCP110       | BCAP31         |
| 494  | CHST7         | TBC1D19      | PRPF38B      | CCT6A          | 994  | SLC17A3        | MLF1         | MKI67        | RBX1           |
| 495  | LRRCC25       | SNX14        | SMN1         | G6PD           | 995  | PPP1R14A       | ZNF816       | UTP6         | LHFP2L         |
| 496  | NFKB2         | SWAP70       | EGFLAM       | C7orf50        | 996  | CDH6           | VEG          | ATR          | CSNK2B         |
| 497  | MGAT4B        | PHTF1        | SMN2         | EPDR1          | 997  | RBM22          | AP3M1        | TMEM65       | MRPS5          |
| 498  | DAPK3         | CDYL         | GARNL3       | PHLN1          | 998  | HSPB2-C11orf52 | MUC1         | PDE1A        | CPS1           |
| 499  | CALM1         | RBM20        | TSPAN9       | NSF            | 999  | PIIB           | DIDO1        | BMPR1B       | SRR            |
| 500  | PDE6H         | PKP4         | TBL1XR1      | TRAPPC4        | 1000 | NLRX1          | UBE2D3       | FGFR4        | SPRYD3         |
